# Supplementary material for: Extensive recoding of dengue virus type 2 specifically reduces replication in primate cells without gain-of-function in Aedes aegypti mosquitoes
Source: PubMed Central journal article supplement (PMC6128446; doi:10.1371/journal.pone.0198303), 2018-09-07
Supplement: pone.0198303.s001.pdf [file pone.0198303.s001.pdf]

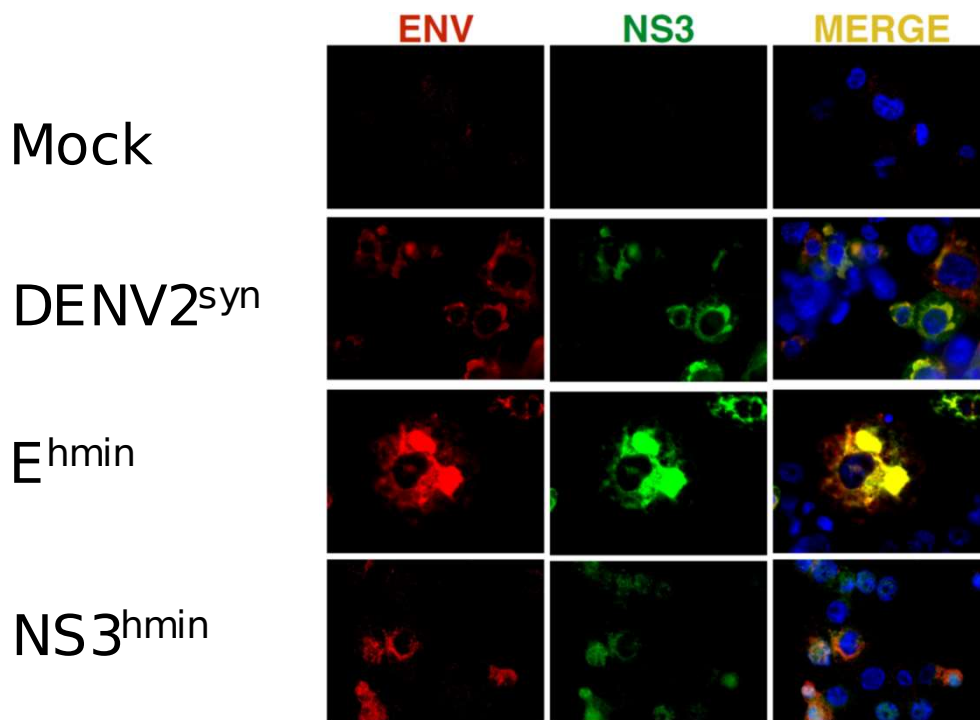

**Figure S1.** Deconvolution microscopy of THP-1 cells infected with D2-Syn, E hMin , and NS3 hMin or mock infected at an MOI of 5.0. At 2 days post infection, infected cells were fixed and stained using 4G2 anti-E or anti-NS3 primary antibodies as well as FITC (NS3) or Alexa 488 (E) conjugated secondary antibodies.
